# Supplementary material for: Mouse visual cortex areas represent perceptual and semantic features of learned visual categories
Source: PubMed Central journal article supplement (PMC8481127; doi:10.1038/s41593-021-00914-5), 2021-09-20
Supplement: 41593_2021_914_MOESM1_ESM.pdf [file 41593_2021_914_MOESM1_ESM.pdf]

---

**Supplementary information**

---

**Mouse visual cortex areas represent perceptual and semantic features of learned visual categories**

---

In the format provided by the authors and unedited

Supplementary information for

## Mouse visual cortex areas represent perceptual and semantic features of learned visual categories

Pieter M. Goltstein, Sandra Reinert, Tobias Bonhoeffer, & Mark Hübener

**Includes:**

Supplementary Tables 1–3

**Supplementary Table 1 | Number of chronically recorded neurons per mouse and visual cortical area across all in-task and out-of-task imaging time points.**

|           | V1   | LM   | AL   | RL   | AM  | PM   | LI  | P   | POR  |
|-----------|------|------|------|------|-----|------|-----|-----|------|
| M13       | 349  | 296  | 294  |      | 402 |      |     |     |      |
| M14       | 368  |      |      | 273  |     |      |     |     |      |
| M15       | 358  |      | 284  |      |     |      |     | 359 | 267  |
| M16       | 287  | 315  | 322  |      |     | 437  |     |     | 330  |
| M17       | 435  | 297  | 383  |      |     | 432  |     |     | 233  |
| M18       | 301  |      |      | 260  |     |      |     |     | 280  |
| M19       | 417  |      |      | 364  |     |      | 261 | 323 |      |
| M20       |      | 305  |      | 299  |     | 399  |     |     | 401  |
| M21       |      |      |      | 341  | 384 | 520  |     |     | 182  |
| M22       |      |      |      | 187  |     | 396  | 345 |     | 333  |
| # neurons | 2515 | 1213 | 1283 | 1724 | 786 | 2184 | 606 | 682 | 2026 |
| # mice    | 7    | 4    | 4    | 6    | 2   | 5    | 2   | 2   | 7    |

Total # of chronically recorded neurons: 13019

**Supplementary Table 2 | Number of chronically recorded neurons per mouse and visual cortical area across in-task imaging time points only.**

|                  | V1          | LM          | AL          | RL          | AM         | PM          | LI         | P          | POR         |
|------------------|-------------|-------------|-------------|-------------|------------|-------------|------------|------------|-------------|
| M13              | 399         | 312         | 309         |             | 410        |             |            |            |             |
| M14              | 383         |             |             | 298         |            |             |            |            |             |
| M15              | 376         |             | 308         |             |            | 324         |            | 378        | 298         |
| M16              | 315         | 325         | 323         |             |            | 450         |            |            | 335         |
| M17              | 441         | 308         | 387         |             |            | 447         |            |            | 237         |
| M18              | 310         |             |             | 273         |            |             |            |            | 286         |
| M19              | 443         |             |             | 382         |            |             | 282        | 359        |             |
| M20              |             | 342         |             | 332         |            | 412         |            |            | 428         |
| M21              |             |             |             | 348         | 398        | 543         |            |            | 265         |
| M22              |             |             |             | 214         |            | 405         | 352        |            | 342         |
| <b># neurons</b> | <b>2667</b> | <b>1287</b> | <b>1327</b> | <b>1847</b> | <b>808</b> | <b>2581</b> | <b>634</b> | <b>737</b> | <b>2191</b> |
| <b># mice</b>    | <b>7</b>    | <b>4</b>    | <b>4</b>    | <b>6</b>    | <b>2</b>   | <b>6</b>    | <b>2</b>   | <b>2</b>   | <b>7</b>    |

Total # of chronically recorded neurons: 14079

**Supplementary Table 3 | Regressors in the encoding model**

| Name                         | Aligned to trial event                                      | Range (s)      | Group               |
|------------------------------|-------------------------------------------------------------|----------------|---------------------|
| <i>Discrete regressors</i>   |                                                             |                |                     |
| Orientation 1                | Stimulus onset (SO)                                         | -0.5 to +2.5   | Stim. all; Ori/SF   |
| Orientation 2                | Stimulus onset                                              | -0.5 to +2.5   | Stim. all; Ori/SF   |
| Orientation 3                | Stimulus onset                                              | -0.5 to +2.5   | Stim. all; Ori/SF   |
| Orientation 4                | Stimulus onset                                              | -0.5 to +2.5   | Stim. all; Ori/SF   |
| Orientation 5                | Stimulus onset                                              | -0.5 to +2.5   | Stim. all; Ori/SF   |
| Orientation 6                | Stimulus onset                                              | -0.5 to +2.5   | Stim. all; Ori/SF   |
| Spatial freq. 1              | Stimulus onset                                              | -0.5 to +2.5   | Stim. all; Ori/SF   |
| Spatial freq. 2              | Stimulus onset                                              | -0.5 to +2.5   | Stim. all; Ori/SF   |
| Spatial freq. 3              | Stimulus onset                                              | -0.5 to +2.5   | Stim. all; Ori/SF   |
| Spatial freq. 4              | Stimulus onset                                              | -0.5 to +2.5   | Stim. all; Ori/SF   |
| Spatial freq. 5              | Stimulus onset                                              | -0.5 to +2.5   | Stim. all; Ori/SF   |
| Left category                | Stimulus onset                                              | -0.5 to +2.5   | Stim. all; Category |
| Right category               | Stimulus onset                                              | -0.5 to +2.5   | Stim. all; Category |
| Task                         | Stimulus onset                                              | -0.5 to +2.5   | Task                |
| Run                          | Running onset                                               | SO-0.5 to +2.5 | Running             |
| Choice left 1                | First sequence of three left licks in a row                 | SO-0.5 to +2.5 | Choice              |
| Choice right 1               | First sequence of three right licks in a row                | SO-0.5 to +2.5 | Choice              |
| Choice left 2                | First left lick in the trial response window                | SO-0.5 to +2.5 | Choice              |
| Choice right 2               | First right lick in the trial response window               | SO-0.5 to +2.5 | Choice              |
| Reward                       | Reward delivery                                             | -0.5 to +2.5   | Reward              |
| T.O.                         | First lick in the trial response window in incorrect trials | -0.5 to +2.5   | Reward              |
| <i>Continuous regressors</i> |                                                             |                |                     |
| Lick rate (left)             | -                                                           | -1.0 to +1.0   | Choice              |
| Lick rate (right)            | -                                                           | -1.0 to +1.0   | Choice              |
| Speed                        | -                                                           | -1.0 to +1.0   | Running             |

Overview of regressors included in the encoding model (GLM analysis). The range of the regressor sets is defined relative to the trial event that the regressor was aligned to, except for specific values that are displayed as SO-##. The SO-## ranges started all ~0.5 seconds before stimulus onset. However, also these regressors were always aligned to their associated event (which was defined to be at precisely time point 0 within the range). Note that Left and Right category were defined as the trained categories.
